# Supplementary material for: Aza-BODIPY based polymeric nanoparticles for cancer cell imaging
Source: Royal Society of Chemistry journal article supplement (doi:10.1039/c8ra08145j), 2018-01-01
Supplement: c8ra08145j1.pdf [file c8ra08145j1.pdf]

## Supporting Information

### Aza-BODIPY Based Polymeric Nanoparticles for Cancer Cell Imaging

Kantapat Chansaenpak,<sup>a</sup> Similan Tanjindaprteep,<sup>b</sup> Nipha Chaicharoenaudomrung,<sup>c</sup> Oratai Weeranantanapan,<sup>d</sup> Parinya Noisa<sup>c</sup> and Anyanee Kamkaew<sup>b,e,\*</sup>

<sup>a</sup>National Nanotechnology Center, National Science and Technology Development Agency, Thailand Science Park, Pathum Thani 12120, Thailand

<sup>b</sup>School of Chemistry, Institute of Science, Suranaree University of Technology, Nakhon Ratchasima 30000, Thailand

<sup>c</sup>Laboratory of Cell-Based Assays and Innovations, School of Biotechnology, Institute of Agricultural Technology, Suranaree University of Technology, Nakhon Ratchasima 30000, Thailand

<sup>d</sup>School of Preclinical Sciences, Institute of Science, Suranaree University of Technology, Nakhon Ratchasima 30000, Thailand

<sup>e</sup>Center of Excellent in Advanced Functional Materials, Suranaree University of Technology, Nakhon Ratchasima 30000, Thailand

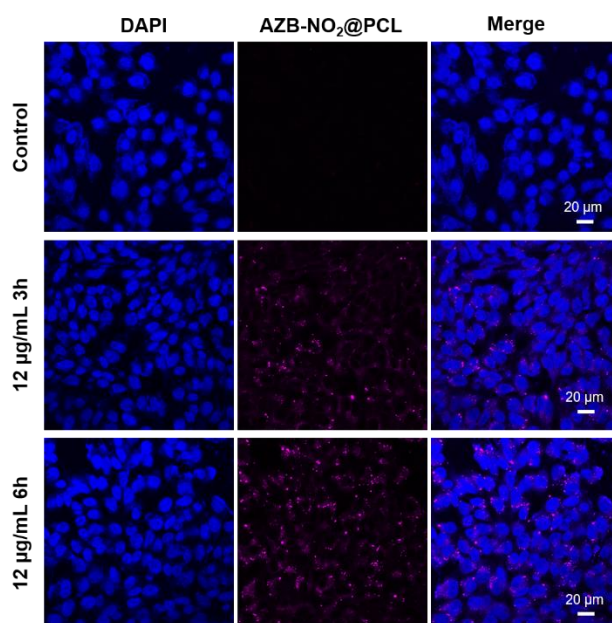

**Figure S1** . Confocal laser scanning microscopy (CLSM) imaging of **AZB-NO<sub>2</sub>@PCL** in U251 cells . The cells were treated with NPs at concentration of 12 µg/mL and incubated for 3 and 6 h . The results showed NIR fluorescent signal (purple) increased according to prolonged incubation time .

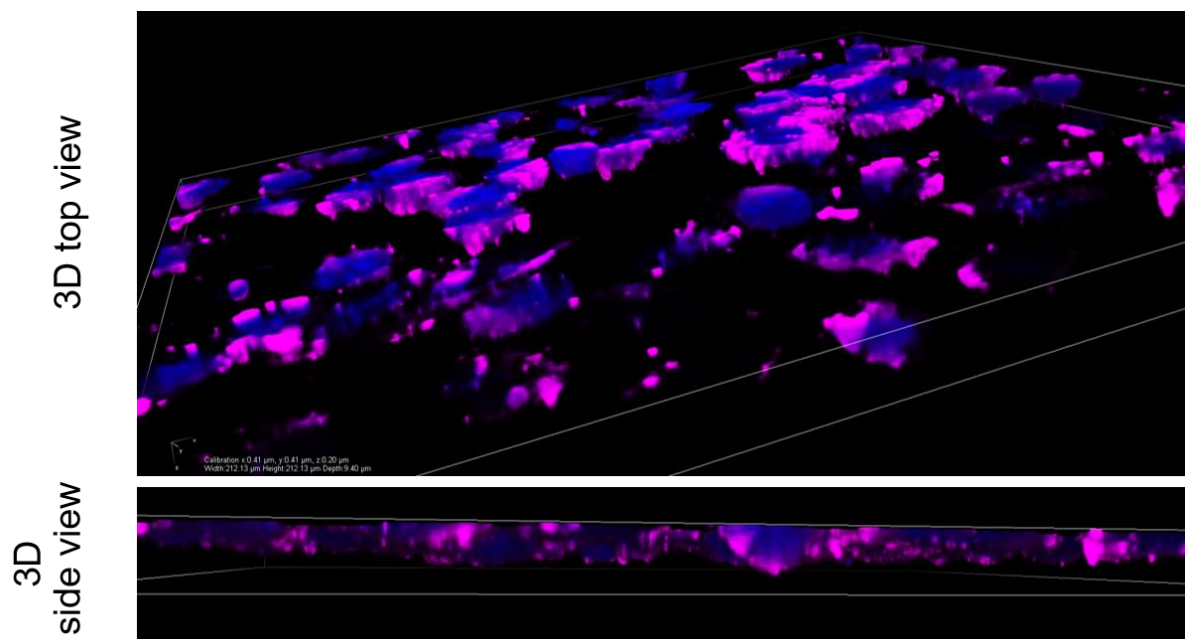

**Figure S2** .Z-stack image created by merging serial scans of thick tissue section ( $\sim 10 \mu\text{m}$ ), viewed under 60x magnification confocal laser scanning microscopy .Z-stack confocal image of U251 cells treated with **AZB-NO<sub>2</sub>@PCL** (purple) and the nuclear stain DAPI (blue). The 3 dimensional cut-out at the top of the image shows **AZB-NO<sub>2</sub>@PCL** localized to the cytosolic portion of the cell and do not penetrate the nucleus.

**Table S1.** Characteristics of **AZB-NO<sub>2</sub>@PCL** prepared from different amounts of Kolliphor P 188 and sonication time with the fixed amount of dye feed at 0.8 mg.\*

| Entry     | Amount of dye feed (mg) | Amount of Kolliphor P 188 in water (%w/v) | Sonication time (min) | DLS size (nm) (n=3) | PDI (n=3)             | Zeta ( $\zeta$ )-potential (mV) (n=3) |
|-----------|-------------------------|-------------------------------------------|-----------------------|---------------------|-----------------------|---------------------------------------|
| 1         | 0.8                     | 1                                         | 5                     | 238.6 ( $\pm 8.2$ ) | 0.545 ( $\pm 0.018$ ) | -5.73 ( $\pm 0.62$ )                  |
| 2         | 0.8                     | 3                                         | 5                     | 244.5 ( $\pm 6.5$ ) | 0.194 ( $\pm 0.010$ ) | -6.12 ( $\pm 0.45$ )                  |
| 3         | 0.8                     | 7                                         | 5                     | 203.5 ( $\pm 5.6$ ) | 0.187 ( $\pm 0.008$ ) | -6.78 ( $\pm 0.48$ )                  |
| 4         | 0.8                     | 5                                         | 2.5                   | 267.7 ( $\pm 3.4$ ) | 0.121 ( $\pm 0.014$ ) | -7.16 ( $\pm 0.57$ )                  |
| 5         | 0.8                     | 5                                         | 10                    | 185.6 ( $\pm 7.6$ ) | 0.486 ( $\pm 0.016$ ) | -5.64 ( $\pm 0.54$ )                  |
| Reference | 0.8                     | 5                                         | 5                     | 202.2 ( $\pm 6.1$ ) | 0.185 ( $\pm 0.006$ ) | -6.89 ( $\pm 0.50$ )                  |

\*Characteristics in each entry were derived from three different batches of nanoparticle preparation (n=3).

**Table S2.** Characteristics of **AZB-NO<sub>2</sub>@PCL** incubated in phosphate buffer solution (10 mM, pH 7.4) at 37 °C at various incubation times.\*

| Entry | Amount of dye feed (mg) | Amount of Surfactant in water (%w/v) | Sonication time (min) | incubation time (days) | DLS size (nm) (n=3) | PDI (n=3)             | Zeta ( $\zeta$ )-potential (mV) (n=3) |
|-------|-------------------------|--------------------------------------|-----------------------|------------------------|---------------------|-----------------------|---------------------------------------|
| 1     | 0.8                     | 5                                    | 5                     | 0                      | 201.3 ( $\pm 3.4$ ) | 0.187 ( $\pm 0.018$ ) | -6.24 ( $\pm 0.38$ )                  |
| 2     | 0.8                     | 5                                    | 5                     | 0.5                    | 203.3 ( $\pm 4.8$ ) | 0.191 ( $\pm 0.011$ ) | -6.48 ( $\pm 0.43$ )                  |
| 3     | 0.8                     | 5                                    | 5                     | 1                      | 205.2 ( $\pm 4.3$ ) | 0.185 ( $\pm 0.016$ ) | -6.42 ( $\pm 0.51$ )                  |
| 4     | 0.8                     | 5                                    | 5                     | 2                      | 204.5 ( $\pm 5.4$ ) | 0.188 ( $\pm 0.018$ ) | -6.32 ( $\pm 0.42$ )                  |
| 5     | 0.8                     | 5                                    | 5                     | 3                      | 202.7 ( $\pm 3.8$ ) | 0.192 ( $\pm 0.012$ ) | -6.56 ( $\pm 0.36$ )                  |
| 6     | 0.8                     | 5                                    | 5                     | 5                      | 203.6 ( $\pm 4.2$ ) | 0.195 ( $\pm 0.016$ ) | -6.62 ( $\pm 0.45$ )                  |
| 7     | 0.8                     | 5                                    | 5                     | 7                      | 204.5 ( $\pm 5.1$ ) | 0.193 ( $\pm 0.015$ ) | -6.53 ( $\pm 0.32$ )                  |

\*Characteristics in each entry were derived from three different batches of nanoparticle preparation (n=3).
